# Supplementary material for: Apoptotic mechanisms of gastric cancer cells induced by isolated erinacine S through epigenetic histone H3 methylation of FasL and TRAIL
Source: Royal Society of Chemistry journal article supplement (doi:10.1039/d0fo03089a), 2021-01-01
Supplement: d0fo03089a1.pdf [file d0fo03089a1.pdf]

Graphical Abstract

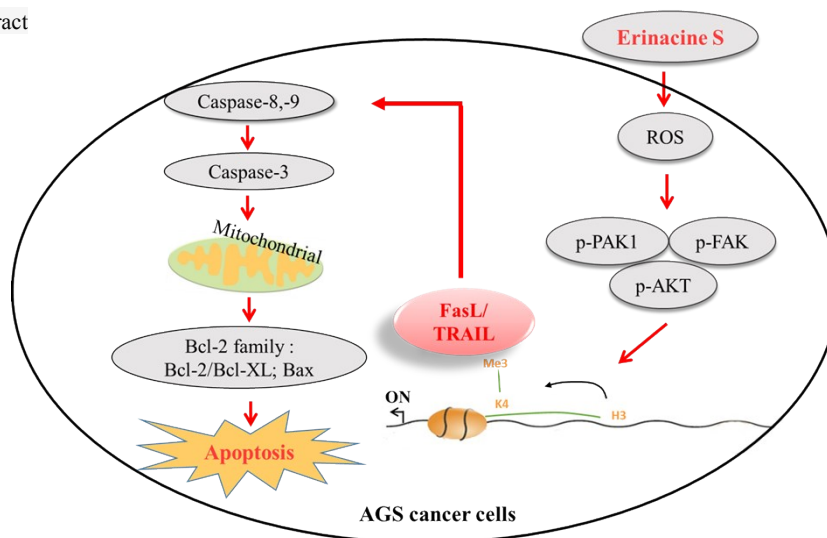

Graphical Abstract

Schematic presentation of the molecular mechanism underlying erinacine S that induces cell apoptosis of AGS gastric cancer cells.
